# Supplementary material for: A framework for integrating genomics, microbial traits, and ecosystem biogeochemistry
Source: Research Square preprint supplement (doi:10.21203/rs.3.rs-4966902/v1), 2024-09-23
Supplement: Supplementary file 1 [file Supplementary Data File 2_Functional group map.xlsx]

## Sheet: Sheet1
Functional Group	microtrait-trait combination	microtrait-trait combination as rules
heterotroph	Resource Acquisition:Substrate degradation:simple compound degradation	glycolysis-ED_full | glycolysis-EMP_full | fructose degradation | fucose degradation | maltose degradation | galactose degradation | mannose degradation | trehalose degradation | galacturonate degradation | glucuronate degradation | glycerol degradation | resorcinol degradation	('glucose->G6P') & ('G6P->6PGL') & ('6PGL->6PG') & ('6PG->KDPG') & ('KDPG->pyruvate+G3P') | ('glucose->G6P') & ('G6P<->F6P') & ('F6P->F16BP') & ('G3P<->PGAP') & ('PGAP<->3PG') & ('3PG<->2PG') & ('2PG<->PEP') & ('PEP->pyruvate') | ('fructose->fructose6P') | (('fucose->fuculose') & ('fuculose->fuculose1P') & ('fuculose1P->glyceroneP')) | ('maltose->glucose') | (('galactose->alphagalactose') & ('alp…
ETC	Resource Use:Chemotrophy:chemoorganoheterotrophy:aerobic respiration:electron transport chain: ETC	ETC_complexI-II-III-IV	('nuo_and') | ('succinate->fumarate_key') | ('cytochromecreductase_or') | (('cytochromeoubiquinol_and') | ('cytochromec_and') | ('cytochromeaa3600menaquinol_and' | 'cytochromeccbb3oxidase_and'))
denitrification	Resource Use:Chemotrophy:chemolithoheterotrophy:anaerobic respiration:N (denitrification)	nitrate->nitrite_dissimilatory_full | nitrate->nitricoxide_complete | nitrate->nitrousoxide_complete | nitrate->dinitrogen_complete	('narGHI_and' | 'napAB_and') | (('nitrate->nitrite_dissimilatory_full') & ('nitrite->nitricoxide_partial')) | (('nitrate->nitricoxide_complete') | ('nitricoxide->nitrousoxide_full')) | (('nitrate->nitrousoxide_complete') & ('nitrousoxide->dinitrogen'))
ammonia oxidation	Resource Use:Chemotrophy:chemolithoautotrophy:aerobic ammonia oxidation	ammonia oxidation to nitrite_partial	(('ammonia->hydroxylamine_partial') | ('hydroxylamine->nitrite'))
nitrite oxidation	Resource Use:Chemotrophy:chemolithoautotrophy:nitrite oxidation	nitrite->nitrate_full	('narG' & 'narH')
nitrogen fixation	Resource Acquisition:Substrate assimilation:N compounds:nitrogen fixation	nitrogen fixation_key	(('dinitrogen->ammonia_key'))
aerobic diazotroph	Resource Acquisition:Substrate assimilation:N compounds:nitrogen fixation & Resource Use:Chemotrophy:chemoorganoheterotrophy:aerobic respiration:electron transport chain: ETC	nitrogen fixation_key & ETC_complexI-II-III-IV	(('dinitrogen->ammonia_key')) & ('nuo_and') | ('succinate->fumarate_key') | ('cytochromecreductase_or') | (('cytochromeoubiquinol_and') | ('cytochromec_and') | ('cytochromeaa3600menaquinol_and' | 'cytochromeccbb3oxidase_and'))
anaerobic diazotroph	Resource Acquisition:Substrate assimilation:N compounds:nitrogen fixation & !Resource Use:Chemotrophy:chemoorganoheterotrophy:aerobic respiration:electron transport chain: ETC	nitrogen fixation_key & !ETC_complexI-II-III-IV	(('dinitrogen->ammonia_key')) & !(('nuo_and') | ('succinate->fumarate_key') | ('cytochromecreductase_or') | (('cytochromeoubiquinol_and') | ('cytochromec_and') | ('cytochromeaa3600menaquinol_and' | 'cytochromeccbb3oxidase_and')))
methane oxidation	Resource Acquisition:Substrate assimilation:C1 compounds:methanotrophy:methane oxidation pathway & Resource Use:Chemotrophy:chemoorganoheterotrophy:aerobic respiration:electron transport chain: ETC	CH4->CH3OH	(('mmoX' | 'mmoY' | 'mmoZ' | 'mmoC' | 'mmoD') | ('pmoA-amoA' | 'pmoB-amoB' | 'pmoC-amoC')) & ('nuo_and') | ('succinate->fumarate_key') | ('cytochromecreductase_or') | (('cytochromeoubiquinol_and') | ('cytochromec_and') | ('cytochromeaa3600menaquinol_and' | 'cytochromeccbb3oxidase_and'))
acetoclastic methanogenesis	Resource Use:Chemotrophy:chemolithoheterotrophy:anaerobic respiration:acetoclastic methanogenesis & (mcrA | mcrB | mcrG)	acetoclastic methanogenesis_key & (mcrA | mcrB | mcrG)	('acetyl-CoA+methylH4MPT->methylH4SPT+CO_partial') & (mcrA | mcrB | mcrG)
hydrogenotrophic methanogenesis	Resource Use:Chemotrophy:chemolithoheterotrophy:anaerobic respiration:hydrogenotrophic methanogenesis & (mcrA | mcrB | mcrG)	hydrogenotrophic methanogenesis_partial & (mcrA | mcrB | mcrG)	(('MF+CO2->formylMF_or') | ('formylMF+H4MPT->MF+formylH4MPT') | ('formylH4MPT->methenylH4MPT') | ('methenylH4MPT->methyleneH4MPT')) & (mcrA | mcrB | mcrG)
