# Supplementary material for: A framework for integrating genomics, microbial traits, and ecosystem biogeochemistry
Source: Research Square preprint supplement (doi:10.21203/rs.3.rs-4966902/v1), 2024-09-23
Supplement: Supplementary file 4 [file Supplementary Data File 7_Rmax and Km data fro.xlsx]

## Sheet: Table
Microbial Functional Groups	Parameter	Range	Mean± std	References
Aerobic heterotroph	Rmax, gC (gC)-1 h-1	0.0253 ~ 0.1640	0.1007 ±0.0316	Kovárová-Kovar and Egli, T., 1998; Insel et al., 2007
	Km, gC×m-3	0.0020~6.6000	0.7709 ±1.7094	Kovárová-Kovar and Egli, T., 1998; Insel et al., 2007
Fermenters	Rmax, gC (gC)-1 h-1	0.0047~0.5417	0.2092±0.1559	Schiloach et al., 1995; Kovarova et al., 1996; Hempflin and Mainzer, 1975
	Km, gC×m-3	0.0220~11.333	3.1964±0.4.7216	Chittibabu et al., 2006; Du Preez et al., 1981; Gomez-Flores, 2015
Acetoclastic methanogen	Rmax, gC (gC)-1 h-1	0.0089 ~ 0.2052	0.0678 ±0.0542	Westermann et al., 1989; Clarens and Molleta, 1990; Wu et al., 2022; Rajoka et al. 1999; Ohtsubo et al. 1992; Huser et al., 1982; Smith and Mah, 1980; Westermann et al., 1989; Peinemann et al., 1988; Eikmanns and Thauer, 1984;
	Km, gC×m-3	4.6800 ~ 120.00	31.98 ±31.97	Westermann et al., 1989; Wu et al., 2022; Smith and Mah, 1978; Schönheit et al. (1982); Wandrey and Aivasidis, 1983; Fukuzaki et al., 1990; Patel, 1984; Zehnder et al., 1980; Huser et al., 1982; Ohtsubo et al., 1992
Hydrogenotrophic methanogen	Rmax, gC (gC)-1 h-1	0.0016 ~ 1.1800	0.2541±0.2938	Westermann et al., 1989; Robinson and Tiedje, 1984; Lovley et al., 1982; Pennings, 1999; Stewart et al., 2015; Chen et al., 2019; Karadagli and Rittmann, 2005; Lay et al., 1996
	Km, gC×m-3	0.0045 ~ 0.8220	0.1255±0.2151	Schiauer et al., 1982; Westermann et al., 1989; Robinson and Tiedje, 1984; Lovley et al., 1982; Stewart et al., 2015; Kotsyurbenko et al., 2001
Aerobic methanotroph	Rmax, gC (gC)-1 h-1	0.0369 ~ 0.3720	0.1378±0.1229	Bedard and Knowles, 1989; Harwood and Pirt, 1972
	Km, gC×m-3	0.0120~0.9720	0.3963±0.3599	Bedard and Knowles, 1989; Smith et al., 1997; Carlsen et al., 1991; Joergensen and Degn, 1987; Joergensen 1985; Linton and Buckee 1977; Linton and Voke, 1978; Joergensen adn Degn, 1987; Carlsen et al., 1991

## Sheet: References
	Kovárová-Kovar, K. and Egli, T., 1998. Growth kinetics of suspended microbial cells: from single-substrate-controlled growth to mixed-substrate kinetics. Microbiology and molecular biology reviews, 62(3), pp.646-666.
	Insel, G., Celikyilmaz, G., Ucisik‐Akkaya, E., Yesiladali, K., Cakar, Z.P., Tamerler, C. and Orhon, D., 2007. Respirometric evaluation and modeling of glucose utilization by Escherichia coli under aerobic and mesophilic cultivation conditions. Biotechnology and bioengineering, 96(1), pp.94-105.
	Aguilar, A., Casas, C. and Lema, J.M., 1995. Degradation of volatile fatty acids by differently enriched methanogenic cultures: kinetics and inhibition. Water Research, 29(2), pp.505-509.
	Chittibabu, G., Nath, K. and Das, D., 2006. Feasibility studies on the fermentative hydrogen production by recombinant Escherichia coli BL-21. Process Biochemistry, 41(3), pp.682-688.
	Du Preez, J.C., Toerien, D.F. and Lategan, P.M., 1981. Growth parameters of Acinetobacter calcoaceticus on acetate and ethanol. European journal of applied microbiology and biotechnology, 13(1), pp.45-53.
	Gomez-Flores, M., Nakhla, G. and Hafez, H., 2015. Microbial kinetics of Clostridium termitidis on cellobiose and glucose for biohydrogen production. Biotechnology letters, 37(10), pp.1965-1971.
	Hempfling, W.P. and Mainzer, S.E., 1975. Effects of varying the carbon source limiting growth on yield and maintenance characteristics of Escherichia coli in continuous culture. Journal of bacteriology, 123(3), pp.1076-1087.
	Kleman, Gary L., and William R. Strohl. "Acetate metabolism by Escherichia coli in high-cell-density fermentation." Applied and environmental microbiology 60.11 (1994): 3952-3958.
	Kovarova, K., A. J. Zehnder, and T. Egli. "Temperature-dependent growth kinetics of Escherichia coli ML 30 in glucose-limited continuous culture." Journal of bacteriology 178.15 (1996): 4530-4539.
	Shiloach, J., Kaufman, J., Guillard, A.S. and Fass, R., 1996. Effect of glucose supply strategy on acetate accumulation, growth, and recombinant protein production by Escherichia coli BL21 (λDE3) and Escherichia coli JM109. Biotechnology and bioengineering, 49(4), pp.421-428.
	Clarens, M. and Molleta, R., 1990. Kinetic studies of acetate fermentation by Methanosarcina sp. MSTA-1. Applied microbiology and biotechnology, 33(2), pp.239-244.
	Eikmanns, B. and Thauer, R.K., 1984. Catalysis of an isotopic exchange between CO2 and the carboxyl group of acetate by Methanosarcina barkeri grown on acetate. Archives of microbiology, 138(4), pp.365-370.
	Fukuzaki, S., Nishio, N. and Nagai, S., 1990. Kinetics of the methanogenic fermentation of acetate. Applied and Environmental Microbiology, 56(10), pp.3158-3163.
	Huser, B.A., Wuhrmann, K. and Zehnder, A.J., 1982. Methanothrix soehngenii gen. nov. sp. nov., a new acetotrophic non-hydrogen-oxidizing methane bacterium. Archives of Microbiology, 132(1), pp.1-9.
	Maestrojuan, G.M. and Boone, D.R., 1991. Characterization of Methanosarcina barkeri MST and 227, Methanosarcina mazei S-6T, and Methanosarcina vacuolata Z-761T. International journal of systematic and evolutionary microbiology, 41(2), pp.267-274.
	Ohtsubo, S., Demizu, K., Kohno, S., Miura, I., Ogawa, T. and Fukuda, H., 1992. Comparison of acetate utilization among strains of an aceticlastic methanogen, Methanothrix soehngenii. Applied and environmental microbiology, 58(2), pp.703-705.
	Patel, G. B. 1984. Characterization and nutritional properties of Methanothrix concilii sp. nov. , a mesophilic, aceticlastic methanogen. Can. J. Microbiol. 30:1383-1396.
	Peinemann, S.U.S.A.N.N.E., Müller, V., Blaut, M.I.C.H.A.E.L. and Gottschalk, G.E.R.H.A.R.D., 1988. Bioenergetics of methanogenesis from acetate by Methanosarcina barkeri. Journal of bacteriology, 170(3), pp.1369-1372.
	Rajoka, M.I., Tabassum, R. and Malik, K.A., 1999. Enhanced rate of methanol and acetate uptake for production of methane in batch cultures using Methanosarcina mazei. Bioresource technology, 67(3), pp.305-311.
	Schönheit, P., Kristjansson, J.K. and Thauer, R.K., 1982. Kinetic mechanism for the ability of sulfate reducers to out-compete methanogens for acetate. Archives of microbiology, 132(3), pp.285-288.
	Smith, M.R. and Mah, R.A., 1980. Acetate as sole carbon and energy source for growth of Methanosarcina strain 227. Applied and Environmental Microbiology, 39(5), pp.993-999.
	Zehnder, A.J., Huser, B.A., Brock, T.D. and Wuhrmann, K., 1980. Characterization of an acetate-decarboxylating, non-hydrogen-oxidizing methane bacterium. Archives of Microbiology, 124(1), pp.1-11.
	Wandrey, C. and Aivasidis, A., 1983. Chemical reaction engineering of anaerobic fermentation. Chem.-Ing.-Tech.;(Germany, Federal Republic of), 55(7).
	Westermann, P., Ahring, B.K. and Mah, R.A., 1989. Temperature compensation in Methanosarcina barkeri by modulation of hydrogen and acetate affinity. Applied and environmental microbiology, 55(5), pp.1262-1266.
	Wu, Q., Guthrie, M.J. and Jin, Q., 2022. Physiological Acclimation Extrapolates the Kinetics and Thermodynamics of Methanogenesis From Laboratory Experiments to Natural Environments. Frontiers in Ecology and Evolution, 10, p.838487.
	Chen, X., Ottosen, L.D.M. and Kofoed, M.V.W., 2019. How low can you go: methane production of methanobacterium congolense at low CO2 concentrations. Frontiers in Bioengineering and Biotechnology, 7, p.34.
	Karadagli, F. and Rittmann, B.E., 2005. Kinetic characterization of Methanobacterium bryantii MoH. Environmental science & technology, 39(13), pp.4900-4905.
	Kotsyurbenko, O.R., Glagolev, M.V., Nozhevnikova, A.N. and Conrad, R., 2001. Competition between homoacetogenic bacteria and methanogenic archaea for hydrogen at low temperature. FEMS microbiology ecology, 38(2-3), pp.153-159.
	Lovley, D.R. and Klug, M.J., 1982. Intermediary metabolism of organic matter in the sediments of a eutrophic lake. Applied and Environmental Microbiology, 43(3), pp.552-560.
	Pennings, J.L.A., 1999. Regulation of hydrogenotrophic methanogenesis in Methanobacterium thermoautotrophicum. [Sl: sn].
	Robinson, J.A. and Tiedje, J.M., 1984. Competition between sulfate-reducing and methanogenic bacteria for H2 under resting and growing conditions. Archives of Microbiology, 137(1), pp.26-32.
	Stewart, L.C., Jung, J.H., Kim, Y.T., Kwon, S.W., Park, C.S. and Holden, J.F., 2015. Methanocaldococcus bathoardescens sp. nov., a hyperthermophilic methanogen isolated from a volcanically active deep-sea hydrothermal vent. International journal of systematic and evolutionary microbiology, 65(Pt_4), pp.1280-1283.
	Westermann, P., Ahring, B.K. and Mah, R.A., 1989. Acetate production by methanogenic bacteria. Applied and Environmental Microbiology, 55(9), pp.2257-2261.
	Lay, J.J., Miyahara, T. and Noike, T., 1996. Methane release rate and methanogenic bacterial populations in lake sediments. Water research, 30(4), pp.901-908.
	King, Gary M. "Associations of methanotrophs with the roots and rhizomes of aquatic vegetation." Applied and Environmental Microbiology 60.9 (1994): 3220-3227.
	Bédard, C.H.A.R.L.E.S. and Knowles, R.O.G.E.R., 1989. Physiology, biochemistry, and specific inhibitors of CH4, NH4+, and CO oxidation by methanotrophs and nitrifiers. Microbiological reviews, 53(1), pp.68-84.
	Harwood, J.H. and Pirt, S.J., 1972. Quantitative aspects of growth of the methane oxidizing bacterium Methylococcus capsulatus on methane in shake flask and continuous chemostat culture. Journal of Applied Bacteriology, 35(4), pp.597-607.
	Smith, K.S., Costello, A.M. and Lidstrom, M.E., 1997. Methane and trichloroethylene oxidation by an estuarine methanotroph, Methylobacter sp. strain BB5. 1. Applied and Environmental Microbiology, 63(11), pp.4617-4620.
	Carlsen, H.N., Joergensen, L. and Degn, H., 1991. Inhibition by ammonia of methane utilization in Methylococcus capsulatus (Bath). Applied Microbiology and Biotechnology, 35(1), pp.124-127.
	Joergensen, L. and Degn, H., 1987. Growth rate and methane affinity of a turbidostatic and oxystatic continuous culture ofMethylococcus capsulatus (Bath). Biotechnology letters, 9(1), pp.71-76.
	Joergensen, L.A.R.S., 1985. Methane oxidation by Methylosinus trichosporium measured by membrane-inlet mass spectrometry. Microbial gas metabolism: mechanistic, metabolic and biotechnological aspects, pp.287-294.
	Linton, J.D. and Buckee, J.C., 1977. Interactions in a methane-utilizing mixed bacterial culture in a chemostat. Microbiology, 101(2), pp.219-225.
	Linton, J.D. and Vokes, J., 1978. Growth of the methane utilising bacterium Methylococcus NCIB 11083 in mineral salts medium with methanol as the sole source of carbon. FEMS Microbiology Letters, 4(3), pp.125-128.
